# Supplementary material for: A robust and cost-effective approach to sequence and analyze complete genomes of small RNA viruses
Source: PubMed Central journal article supplement (PMC5384157; doi:10.1186/s12985-017-0741-5), 2017-04-07

**Additional file 2, Fig. S1** Major processing steps used in the current study

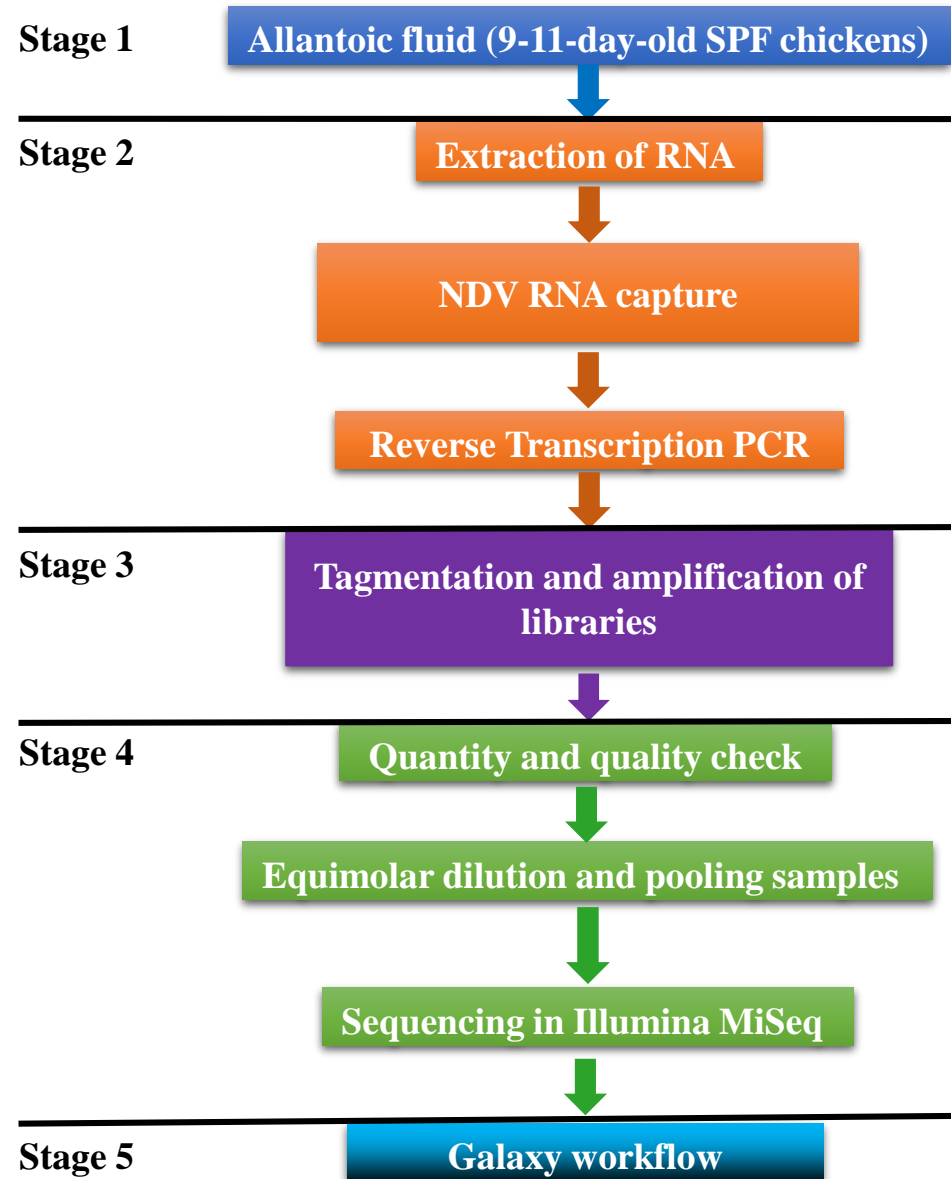

Supplement: 12985_2017_741_MOESM2_ESM.pdf [file 12985_2017_741_MOESM2_ESM.pdf]
